# Supplementary material for: HONO chemistry at a suburban site during the EXPLORE-YRD campaign in 2018: formation mechanisms and impacts on O 3 production
Source: Copernicus journal article supplement (doi:10.5194/acp-23-15455-2023), 2023-12-18
Supplement: Supplementary file 1 [file acp-23-15455-2023-supplement.pdf]

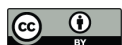

*Supplement of*

## **HONO chemistry at a suburban site during the EXPLORE-YRD campaign in 2018: formation mechanisms and impacts on O<sub>3</sub> production**

**Can Ye et al.**

*Correspondence to:* Keding Lu (k.lu@pku.edu.cn) and Yuanhang Zhang (yhzhang@pku.edu.cn)

The copyright of individual parts of the supplement might differ from the article licence.

35 **Table S1:** Measured parameters and corresponding measurement techniques

| Parameters                                                                                                    | Limit of detection              | Methods                                    | Accuracy |
|---------------------------------------------------------------------------------------------------------------|---------------------------------|--------------------------------------------|----------|
| HONO                                                                                                          | 5 ppt                           | LOPAP                                      | ±10%     |
| OH                                                                                                            | $6 \times 10^5 \text{ cm}^{-3}$ | LIF                                        | ±10%     |
| NO                                                                                                            | 60 ppt                          | Chemiluminescence                          | ±20%     |
| NO <sub>2</sub>                                                                                               | 0.3 ppb                         | Chemiluminescence+<br>Photolytic converter | ±20%     |
| O <sub>3</sub>                                                                                                | 0.5 ppb                         | UV photometry                              | ±5%      |
| CO                                                                                                            | 1 ppb                           | Infrared absorption                        | ±1 ppb   |
| SO <sub>2</sub>                                                                                               | 0.1 ppb                         | Pulsed UV fluorescence                     | ±5%      |
| S <sub>a</sub>                                                                                                | 14-700 nm                       | SMPS                                       | ±20%     |
| HCHO                                                                                                          | 25 ppt                          | Hantzsch fluorimetry                       | ±5%      |
| VOCs                                                                                                          | 20-300 ppt                      | GC-FID/MS                                  | ±15%     |
| PM <sub>2.5</sub>                                                                                             | $0.1 \mu\text{g m}^{-3}$        | TEOM                                       | ±5%      |
| NH <sub>4</sub> <sup>+</sup> , SO <sub>4</sub> <sup>2-</sup> , NO <sub>3</sub> <sup>-</sup> , Cl <sup>-</sup> | $0.05 \mu\text{g m}^{-3}$       | GAC-IC                                     | ±20%     |

40

45

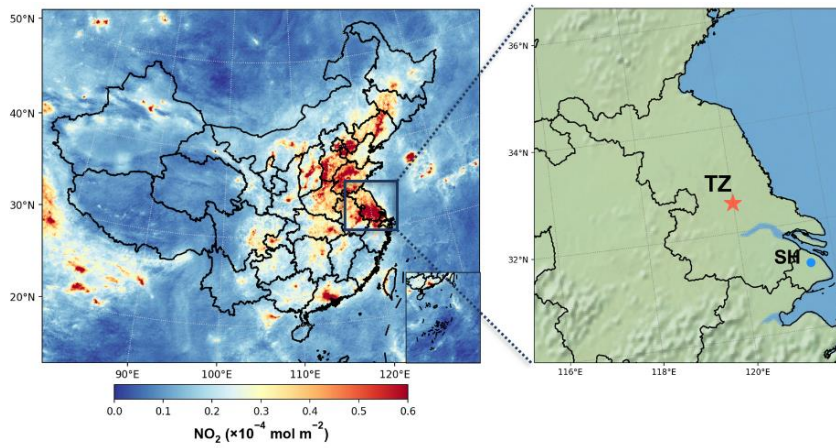

50

**Figure S1:** Location of the field measurement site (red star) in Taizhou (TZ), Jiangsu Province. This site is situated approximately 200 km northwest of Shanghai (SH), one megacity in YRD. The left map is colored by monthly average NO<sub>2</sub> column density (July, 2018) retrieved from TROPOMI (<https://s5phub.copernicus.eu/dhus>).

55

60

65

70

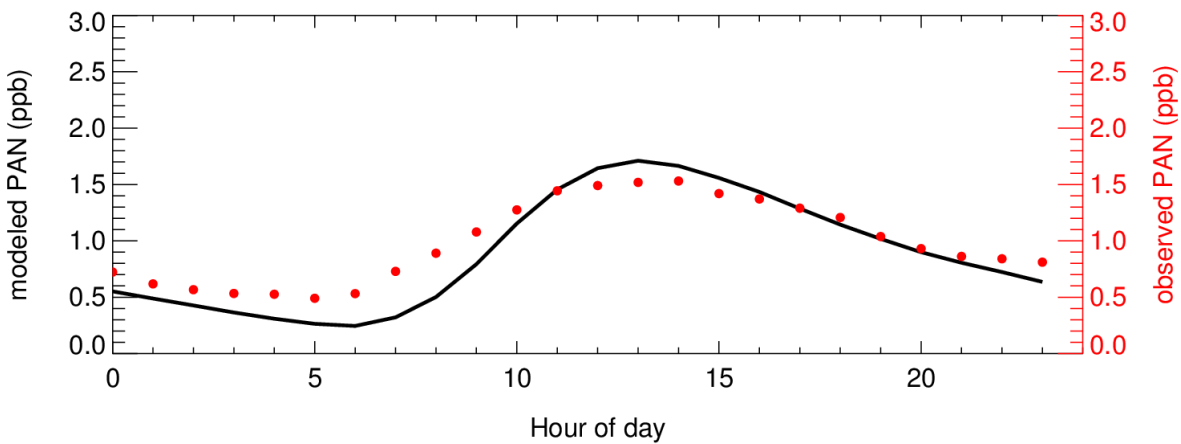

**Figure S2:** Averaged diurnal pattern of observed and modeled PAN if A first-order dilution loss term with a lifetime of 8 hours was incorporated.

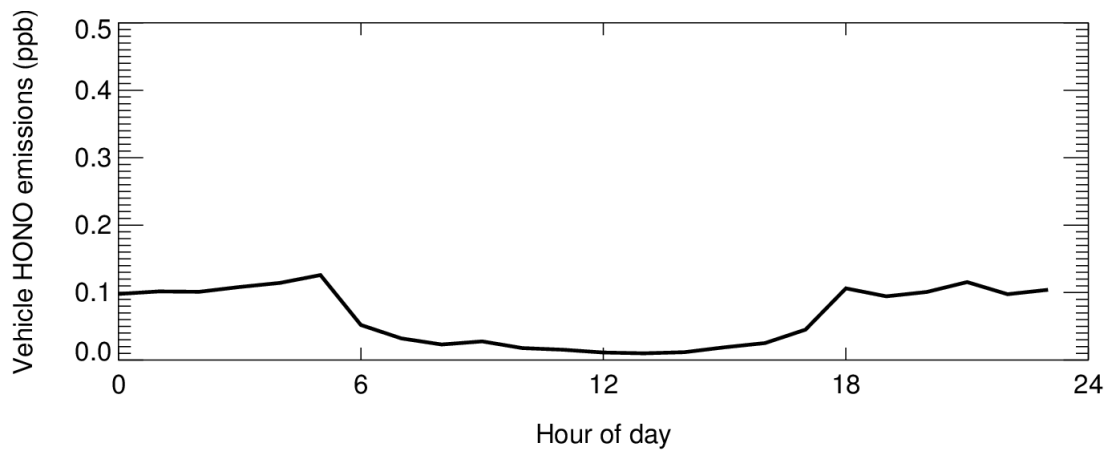

**Figure S3:** Calculated HONO diurnal profile contributed by vehicle emissions.

95

100

105

110

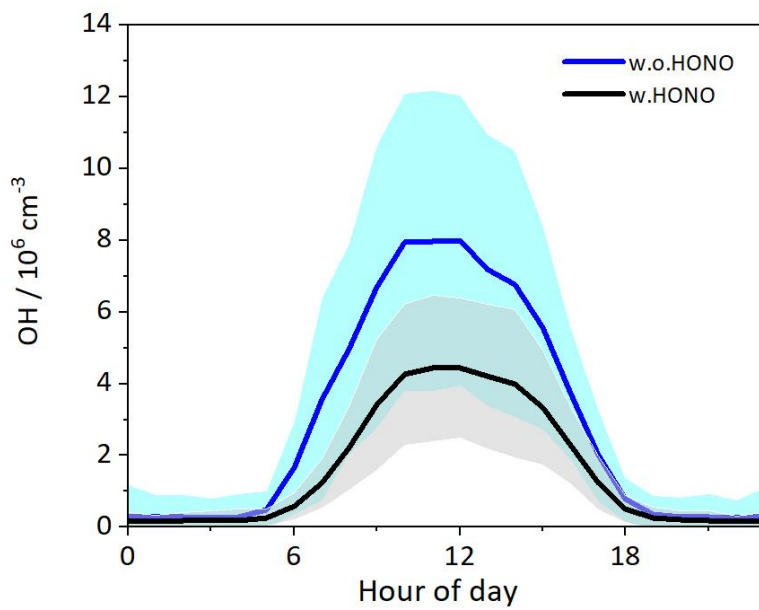

**Figure S4:** The comparison of modeled OH concentration with and without observed HONO as a model constraint.
